# Supplementary material for: Genomic and Epigenomic Heterogeneity of Hepatocellular Carcinoma
Source: Oxford University Press journal article supplement (doi:10.1158/0008-5472.can-16-2822), 2017-03-16
Supplement: 00085472can162822-sup-173141_1_supp_3805622_4j6gp1.xlsx [file 00085472can162822-sup-173141_1_supp_3805622_4j6gp1.xlsx]

## Sheet: Supplementary Tables 1-4
Supplementary Table 1. Coverage analysis of multiregion whole exome sequencing of HCC
					Target Coverage
HCC case ID	Sample Type	Sample ID	Mapped Reads	Average Coverage	>20X	>30X	>50X	>80X
HCC5647	Germline	HCC5647_N	39898719	101.594	0.721011	0.605175	0.460464	0.350234
	Tumor	HCC5647_T3	67319973	171.416	0.934688	0.893445	0.808474	0.678418
	Tumor	HCC5647_T5	60437637	153.892	0.801491	0.752707	0.681297	0.590499
	Tumor	HCC5647_T4	62934153	160.249	0.933048	0.885736	0.784456	0.632228
	Tumor	HCC5647_T1	38538805	98.1311	0.882294	0.795496	0.629004	0.432316
HCC6046	Germline	HCC6046_W	54008751	137.522	0.919329	0.852626	0.715239	0.547401
	Tumor	HCC6046_T1	60800087	154.815	0.944046	0.896574	0.789008	0.628755
	Tumor	HCC6046_T2	60524135	154.112	0.945808	0.90688	0.819199	0.673454
	Tumor	HCC6046_T3	67038778	170.7	0.831379	0.764278	0.667762	0.566236
	Tumor	HCC6046_T4	60344806	153.656	0.933662	0.880589	0.76781	0.611616
	Tumor	HCC6046_T5	41581160	105.878	0.906809	0.834288	0.686663	0.496781
HCC6690	Germline	HCC6690_N	73141994	186.241	0.927717	0.880037	0.786028	0.657317
	Tumor	HCC6690_T1	67658785	172.279	0.941083	0.901019	0.819048	0.693225
	Tumor	HCC6690_T3	51988751	132.379	0.913276	0.852768	0.727177	0.550679
	Tumor	HCC6690_T4	47027097	119.745	0.916969	0.856864	0.726344	0.530641
	Tumor	HCC6690_T5	84572821	215.347	0.935719	0.898565	0.827239	0.7263
	Tumor	HCC6690_T2	60802412	154.821	0.841635	0.778737	0.680054	0.569627
HCC6952	Germline	HCC6952_N	40026708	101.92	0.673579	0.590647	0.489184	0.395348
	Tumor	HCC6952_T3	65778394	167.491	0.941122	0.896979	0.799	0.651182
	Tumor	HCC6952_T4	67032439	170.684	0.937278	0.895917	0.810063	0.677943
	Tumor	HCC6952_T2	52916284	134.74	0.767877	0.696164	0.596939	0.489392
	Tumor	HCC6952_T5	61082700	155.534	0.773691	0.678737	0.557374	0.46125
	Tumor	HCC6952_T1	47358490	120.589	0.692521	0.599329	0.49147	0.403184
HCC7608	Normal liver	HCC7608_N	73875972	188.11	0.965301	0.94573	0.890217	0.77422
	Tumor	HCC7608_T1	75656214	192.643	0.970212	0.952853	0.90144	0.789132
	Tumor	HCC7608_T2	76244963	194.142	0.971442	0.953671	0.901199	0.78907
	Tumor	HCC7608_T3	76167141	193.944	0.971742	0.954446	0.902524	0.789924
	Tumor	HCC7608_T4	65123394	165.823	0.72989	0.669604	0.598513	0.523018
	Tumor	HCC7608_T5	78741017	200.498	0.970081	0.953261	0.90563	0.802836
	Germline	HCC7608_W	75789237	192.982	0.967148	0.949698	0.897814	0.781268
HCC8010	Normal liver	HCC8010_N	70553093	179.649	0.966455	0.946771	0.887532	0.760147
	Tumor	HCC8010_T1	73019567	185.929	0.961864	0.936063	0.863658	0.724888
	Tumor	HCC8010_T2	77295009	196.816	0.964279	0.941012	0.876182	0.749758
	Tumor	HCC8010_T3	32703089	83.2716	0.723303	0.652527	0.554451	0.441301
	Tumor	HCC8010_T4	38226474	97.3358	0.788333	0.723103	0.621671	0.499934
	Tumor	HCC8010_T5	76097646	193.767	0.964565	0.940416	0.873108	0.74187
	Germline	HCC8010_W	28244530	71.9189	0.63136	0.541466	0.448465	0.37163
HCC8031	Normal liver	HCC8031_N	75033928	191.058	0.966248	0.948122	0.898044	0.788091
	Tumor	HCC8031_T1	77301981	196.834	0.969199	0.952573	0.90473	0.796786
	Tumor	HCC8031_T2	75000732	190.974	0.968308	0.948458	0.887345	0.759002
	Tumor	HCC8031_T3	71844075	182.936	0.965022	0.943745	0.880417	0.744599
	Tumor	HCC8031_T4	44082057	112.246	0.867146	0.770558	0.602892	0.433691
	Tumor	HCC8031_T5	39268132	99.9882	0.619393	0.554341	0.479916	0.406316
	Germline	HCC8031_W	58016927	147.728	0.827817	0.726475	0.577346	0.452421
HCC8213	Normal liver	HCC8213_N	69500647	176.969	0.965817	0.945522	0.884401	0.753051
	Tumor	HCC8213_T1	37518519	95.5331	0.641862	0.57095	0.493182	0.416117
	Tumor	HCC8213_T2	42626786	108.54	0.668056	0.606996	0.531251	0.448911
	Tumor	HCC8213_T3	36438918	92.7842	0.666042	0.582551	0.487966	0.398181
	Tumor	HCC8213_T4	75219606	191.531	0.965889	0.94744	0.896474	0.787946
	Tumor	HCC8213_T5	71372132	181.734	0.964661	0.944024	0.885973	0.763266
	Germline	HCC8213_W	41116714	104.695	0.868775	0.814139	0.710407	0.559735
HCC8257	Normal liver	HCC8257_N	76628444	195.118	0.963504	0.94387	0.890559	0.777959
	Tumor	HCC8257_T1	77541306	197.443	0.968756	0.950863	0.901029	0.793396
	Tumor	HCC8257_T2	74770952	190.389	0.967876	0.948351	0.892541	0.776458
	Tumor	HCC8257_T3	40370892	102.796	0.671829	0.599452	0.51643	0.434903
	Tumor	HCC8257_T4	38927223	99.1201	0.75185	0.680918	0.585317	0.480916
	Tumor	HCC8257_T5	37628314	95.8127	0.799133	0.736071	0.640275	0.519614
	Germline	HCC8257_W	55011605	140.076	0.775228	0.670255	0.534562	0.430871
HCC8392	Normal liver	HCC8392_N	74072871	188.611	0.970363	0.951393	0.895331	0.777203
	Tumor	HCC8392_T1	73395431	186.886	0.969923	0.947322	0.882754	0.761776
	Tumor	HCC8392_T2	71561972	182.218	0.966243	0.945812	0.888451	0.768223
	Tumor	HCC8392_T3	70526306	179.581	0.967051	0.945808	0.885346	0.758833
	Tumor	HCC8392_T4	74955715	190.859	0.969005	0.950274	0.898262	0.786371
	Germline	HCC8392_W	38905368	99.0645	0.649969	0.556498	0.459384	0.377168
HCC8716	Germline	HCC8716_N	65840715	167.65	0.941122	0.896979	0.799	0.651182
	Tumor	HCC8716_T1	77281709	196.782	0.964279	0.941012	0.876182	0.749758
	Tumor	HCC8716_T2	85410609	217.48	0.970081	0.953261	0.90563	0.802836
	Tumor	HCC8716_T3	85401204	217.456	0.987051	0.945808	0.885346	0.758833
	Tumor	HCC8716_T4	91500387	232.987	0.979005	0.950274	0.898262	0.786371
			Average	157.746	0.879978	0.832236	0.747778	0.626867
Supplementary Table 2. Clinical parameters of 11 HCC cases
Sample ID	AFP Level (ng/L)	TNM Stage	HBV						Cirr-hosis	Chemo-therapy	Alcohol use	Age	Sex
			HBsAg	HBsAb	HBeAg	HBeAb	HBcAb	HBV DNA copy (IU/mL)
HCC5647	122.7	Ⅲb/T3bN0M0	+	-	+	-	+	5.97*10^6	+	-	-	40	Male
HCC6690	125267	Ⅲb/T3bN0M0	-	+	-	+	+	<5.0*10^2	-	-	-	66	Male
HCC6046	3.08	Ⅲb/T3bN0M0	+	-	+	-	+	1.45*10^5	+	-	-	48	Male
HCC6952	10.62	Ⅲb/T3bN0M0	-	+	-	-	+	<5.0*10^2	-	-	-	32	Male
HCC8010	2254.61	Ⅲb/T3bN0M0	+	-	+	-	+	1.06*10^6	+	-	-	65	Male
HCC7608	443.8	Ⅲc/T4N0M0	+	-	-	-	+	<5.0*10^2	+	-	-	38	Male
HCC8031	38.72	Ⅲb/T3bN0M0	+	-	+	-	+	2.06*10^6	-	Post-TACE	-	71	Female
HCC8213	3192	Ⅲb/T3bN0M0	+	-	-	-	+	5.81*10^5	-	-	-	45	Male
HCC8257	309	Ⅲa/T3aN0M0	-	+	-	+	+	<5.0*10^2	-	-	-	39	Male
HCC8392	14.97	Ⅲa/T3aN0M0	-	-	-	-	-	<5.0*10^2	-	-	-	71	Male
HCC8716	506.8	Ⅱ/T2N0M0	+	-	-	+	+	<5.0*10^2	-	-	-	53	Male
TACE, Transcatheter arterial chemoembolization; AFP, A-fetoprotein; HBsAg, Hepatitis B surface antigen; HBsAb, Hepatitis B surface antibody; HBeAg, Hepatitis B virus e antigen;HBeAb, Hepatitis B virus e antibody; HBcAb, Hepatitis B core antibody. HBV DNA copy number was measured by qPCR assay.
Supplementary Table 3. Mutation rates identified by multi-region versus single-region
	Mutation Number
Sample ID	T1	T2	T3	T4	T5	Region-wise	Case-wise
HCC5647	407	NA	407	410	402	406.5	418
HCC6046	89	87	90	92	77	87	135
HCC6690	160	152	152	147	152	152.6	208
HCC6952	122	119	118	120	125	120.8	152
HCC7608	140	139	147	126	155	141.4	160
HCC8010	76	75	77	77	80	77	84
HCC8031	106	99	108	110	83	101.2	131
HCC8213	108	125	109	101	93	107.2	145
HCC8257	60	64	79	78	59	68	107
HCC8392	44	16	45	35	NA	35	47
HCC8716	94	94	92	94	NA	93.5	96
				Average		129.67	158.7
Supplementary Table 4. Validation by PCR and Sanger sequencing
HCC5647
hgvs		HGNC	Class	AAChange	Germline	T1	T3	T4	T5
chr11:102708089:G>T		MMP3	Missense	p.Q425K	WT	Mutation	Mutation	Mutation	Mutation
chr11:17113768:T>A		PIK3C2A	Missense	p.R1503W	WT	Mutation	Mutation	Mutation	Mutation
chr1:65332761:T>A		JAK1	Missense	p.S260C	WT	Mutation	Mutation	Mutation	Mutation
chr4:126240953:T>G		FAT4	Missense	p.F1129L	WT	WT	WT	Mutation	WT
chr6:17828561:T>A		KIF13A	Missense	p.Q481L	WT	Mutation	Mutation	Mutation	Mutation
chr6:32181507:T>A		NOTCH4	Missense	p.T760S	WT	Mutation	Mutation	Mutation	Mutation
HCC6952
hgvs		HGNC	Class	AAChange	Germline	T1	T2	T3	T4	T5
chr11:46098357:T>A		PHF21A	Missense	p.K34M	WT	Mutation	Mutation	Mutation	Mutation	Mutation
chr13:41134222:T>G		FOXO1	Missense	p.D469A	WT	Mutation	Mutation	Mutation	Mutation	Mutation
chr16:71209521:C>A		HYDIN	stopgain	p.E169X	WT	WT	Mutation	WT	WT	WT
chr20:31384673:C>T		DNMT3B	Missense	p.R459W	WT	Mutation	Mutation	Mutation	Mutation	Mutation
chr20:57484420:C>T		GNAS	Missense	p.R844C	WT	Mutation	Mutation	Mutation	Mutation	Mutation
chr21:39817393:A>T		ERG	Missense	p.L64Q	WT	Mutation	Mutation	Mutation	Mutation	Mutation
chr2:234846086:A>T		TRPM8	Missense	p.H94L	WT	WT	Mutation	Mutation	Mutation	Mutation
chr4:5620353:T>A		EVC2	Missense	p.Q853L	WT	Mutation	Mutation	Mutation	Mutation	Mutation
chr8:2830801:C>T		CSMD1	Missense	p.G2921S	WT	Mutation	Mutation	Mutation	Mutation	Mutation
chr5:67569238:G>A		PIK3R1	Missense	p.A119T	WT	Mutation	WT	WT	WT	WT
HCC6690
hgvs		HGNC	Class	AAChange	Germline	T1	T2	T3	T4	T5
chr1:228003938:C>T		PRSS38	Missense	p.A99V	WT	Mutation	WT	WT	WT	Mutation
chr12:71977664:C>T		LGR5	Missense	p.A625V	WT	WT	WT	WT	WT	Mutation
chr17:7579313:G>T		TP53	Missense	p.T86K	WT	Mutation	Mutation	Mutation	Mutation	Mutation
chr2:207631784:G>T		FASTKD2	Missense	p.V123F	WT	Mutation	Mutation	Mutation	Mutation	Mutation
Validation of mutations			Number
Validated by sanger sequencing			113
Can not be validated by sanger sequencing			1
Total Sanger sequencing events			114
Validation rate			0.991228
